# Supplementary material for: Highly structured homolog pairing reflects functional organization of the Drosophila genome
Source: PubMed Central journal article supplement (PMC6776532; doi:10.1038/s41467-019-12208-3), 2019-10-03
Supplement: 41467_2019_12208_MOESM1_ESM.pdf [file 41467_2019_12208_MOESM1_ESM.pdf]

1 Supplementary Information

2

3

4 **Highly structured homolog pairing reflects functional level of organization of**  
5 **the *Drosophila* genome**

6

7

8

AlHaj Abed *et al.*

1  
2  
3  
4  
5  
6  
7  
8  
9  
10  
11

**Highly structured homolog pairing reflects functional level of organization of  
the *Drosophila* genome**

Jumana AlHaj Abed\*, Jelena Erceg\*, Anton Goloborodko\*, Son C. Nguyen, Ruth B.  
McCole, Wren Saylor, Geoffrey Fudenberg, Bryan R. Lajoie, Job Dekker, Leonid A.  
Mirny†, Ting (C.-ting) Wu†

\*These authors contributed equally to this work.

† Correspondence to: [leonid@mit.edu](mailto:leonid@mit.edu) (L.A.M.); [twu@genetics.med.harvard.edu](mailto:twu@genetics.med.harvard.edu) (C.-t.W.)

1 **Supplementary figures and legends**

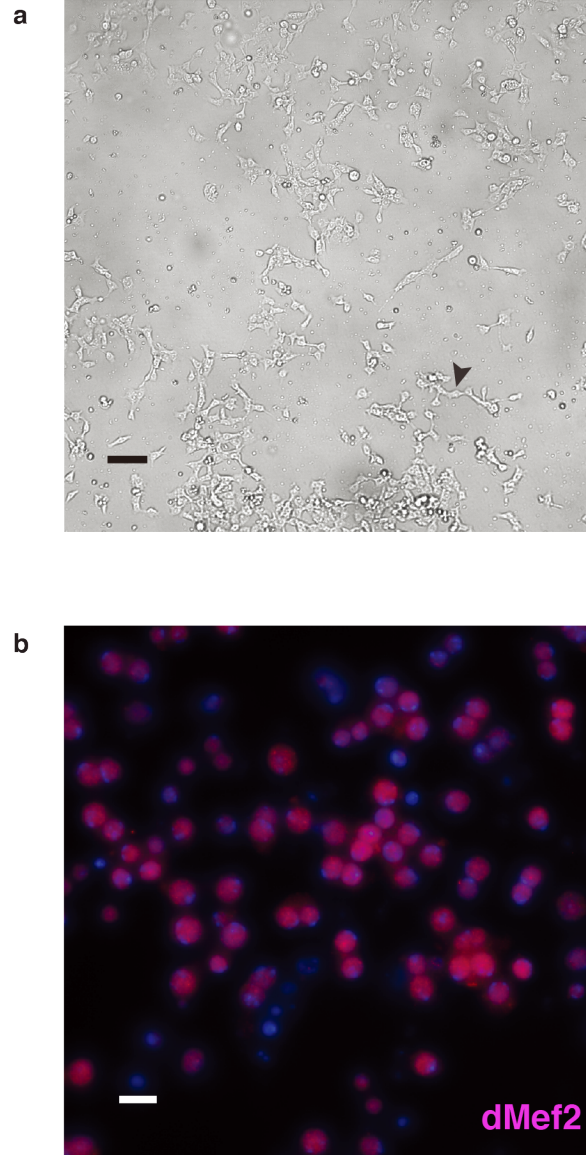

2  
3 **Supplementary Figure 1. PnM cell line morphology and cell-type characterization.** a, PnM  
4 cell culture consists of adherent, bipolar shaped cells (arrow head). The culture is about 70%  
5 confluent and is ready to passage. Bar = 40  $\mu\text{m}$ . b, PnM cells stained for DAPI and the  
6 mesodermal cell marker dMef2, suggested they are predominantly of mesodermal origin. Bar =  
7 10  $\mu\text{m}$ .

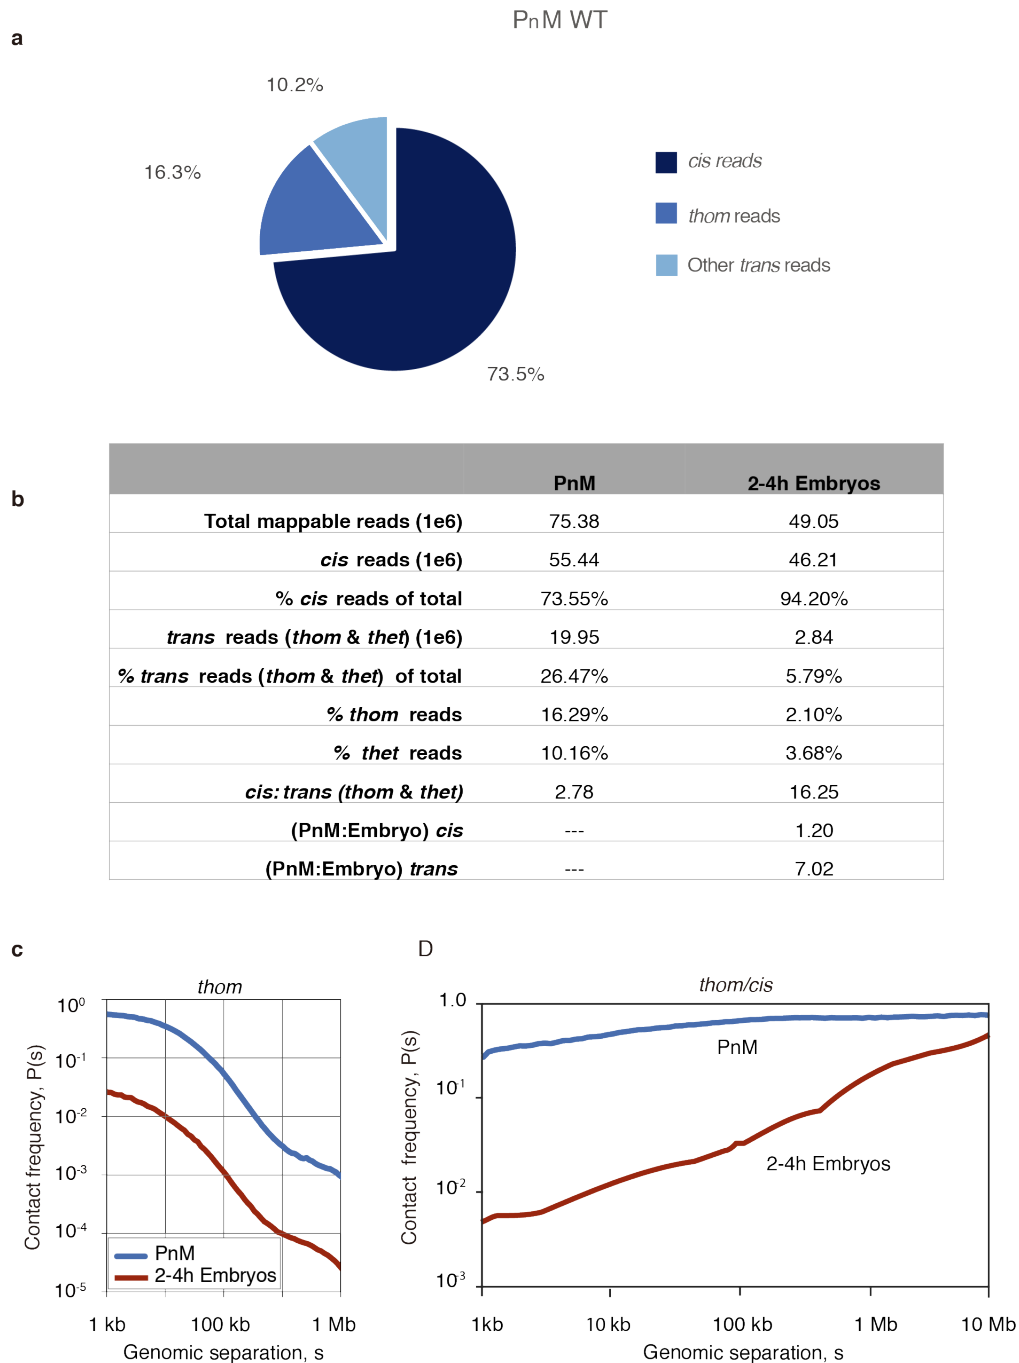

1

2

**Supplementary Figure 2. Trans reads are highly abundant in PnM cells.** **a**, Pie chart

3

comparing percentage of non-duplicated *cis* and *trans* reads recovered after haplotype-resolved

4

mapping to hybrid genome in PnM, where *cis* interactions refer to read pairs with a SNV on each

5

side mapping to the same homolog and *trans* interactions refer to read pair with a SNV on each



1 side mapping to a different homolog or chromosome. Data from PnM untreated cells showing  
2 PnM total *trans*-reads are almost a quarter of total reads. **b**, Comparison of mappable, non-  
3 duplicated reads in PnM and 2-4 h embryos<sup>1</sup> shows that the percent of *trans*-homolog (*thom*)  
4 mappable reads in PnM (16.29%) are ~8-fold those of embryos (2.10%). **c**, *Thom* signature in  
5 PnM cells is greater than *thom* in embryos at all linear separations, *s*, in kilobases (kb). **d**, *Thom*-  
6 to-*cis* contact frequencies in 2-4 h embryos and cells. Around 100 kb separation in PnM cells,  
7 *thom* interaction frequency is almost equal to *cis* interaction frequency. This contrasts to the  
8 pairing signature that is observed in 2-4 h old embryos.

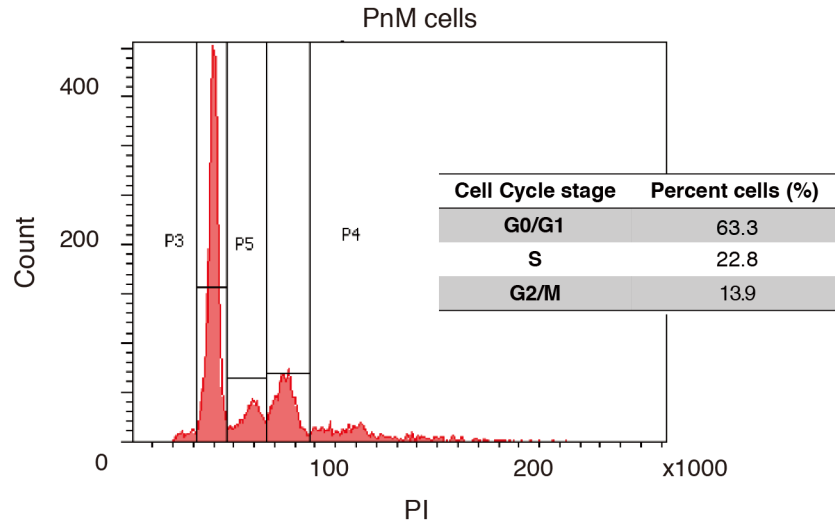

1

2 **Supplementary Figure 3. Cell cycle analysis of PnM cells.** Staining of cells with propidium

3 Iodide at 70% confluency showed that they are predominantly in G1.

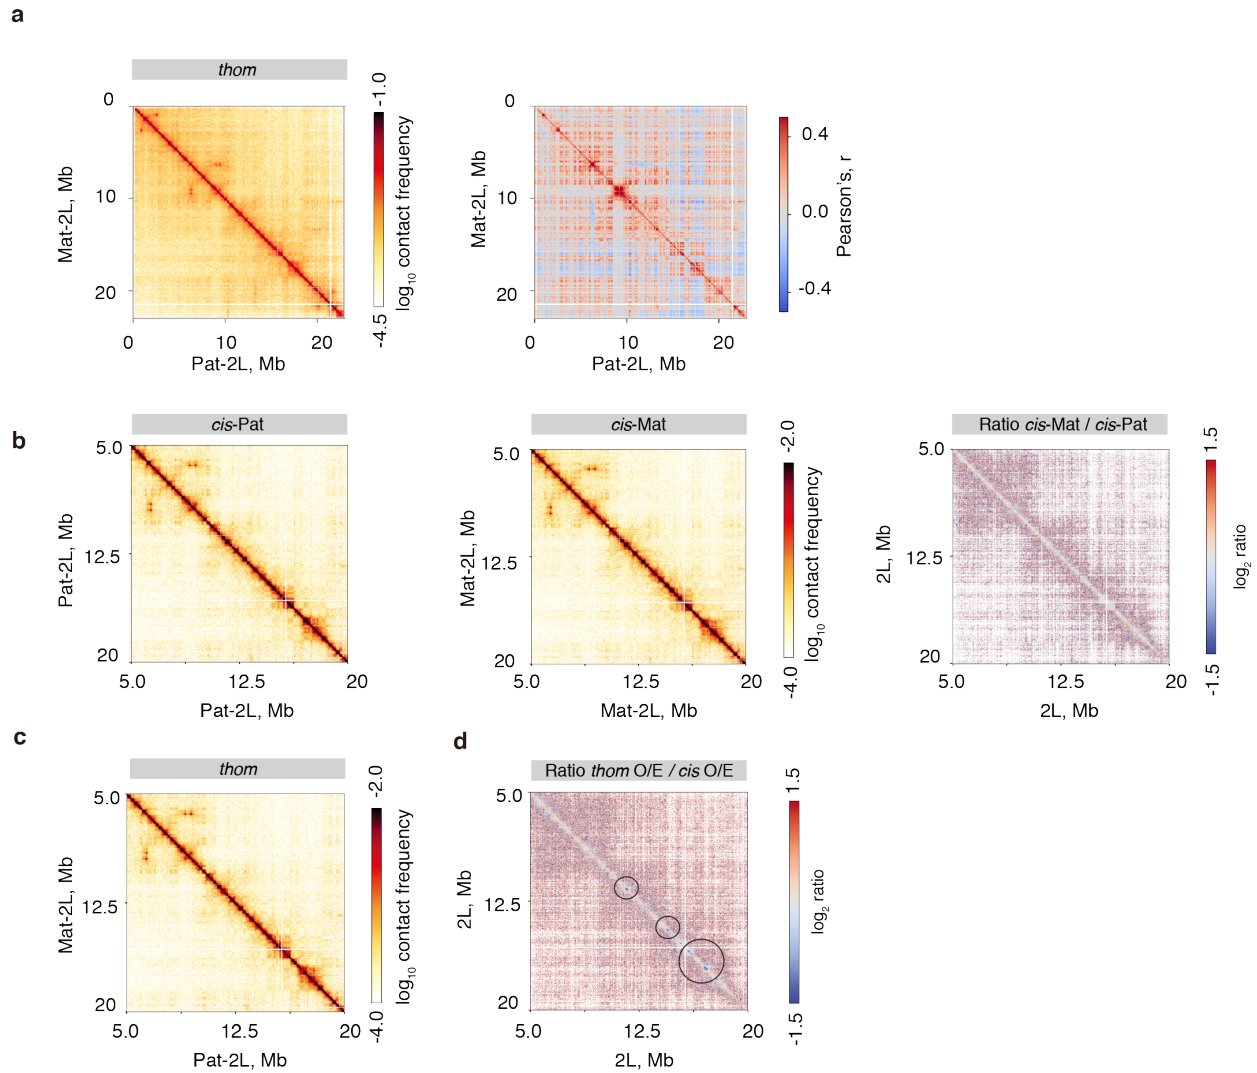

1

2

**Supplementary Figure 4. Haplotype-resolved contact maps reveal compartments between**

3

**homologs and concordance of *cis* and *thom* interactions.** **a**, The *thom* contact map at 2L at 40

4

kb resolution and (left) a map of Pearson's correlation coefficients between rows and columns of

5

the *thom* contact map (right). Both maps show a plaid-like pattern indicative of A-B

6

compartmentalization of loci on homologous chromosomes. **b**, Paternal and maternal *cis* contact

7

maps within 5-20 Mb at 2L are highly concordant. **c**, *Thom* contact map within 5-20 Mb at 2L. **d**,

8

Regions as in b, and c showing *thom* contact frequency depletion detected in blue (circles

9

pointing to some *thom* depleted regions).

1

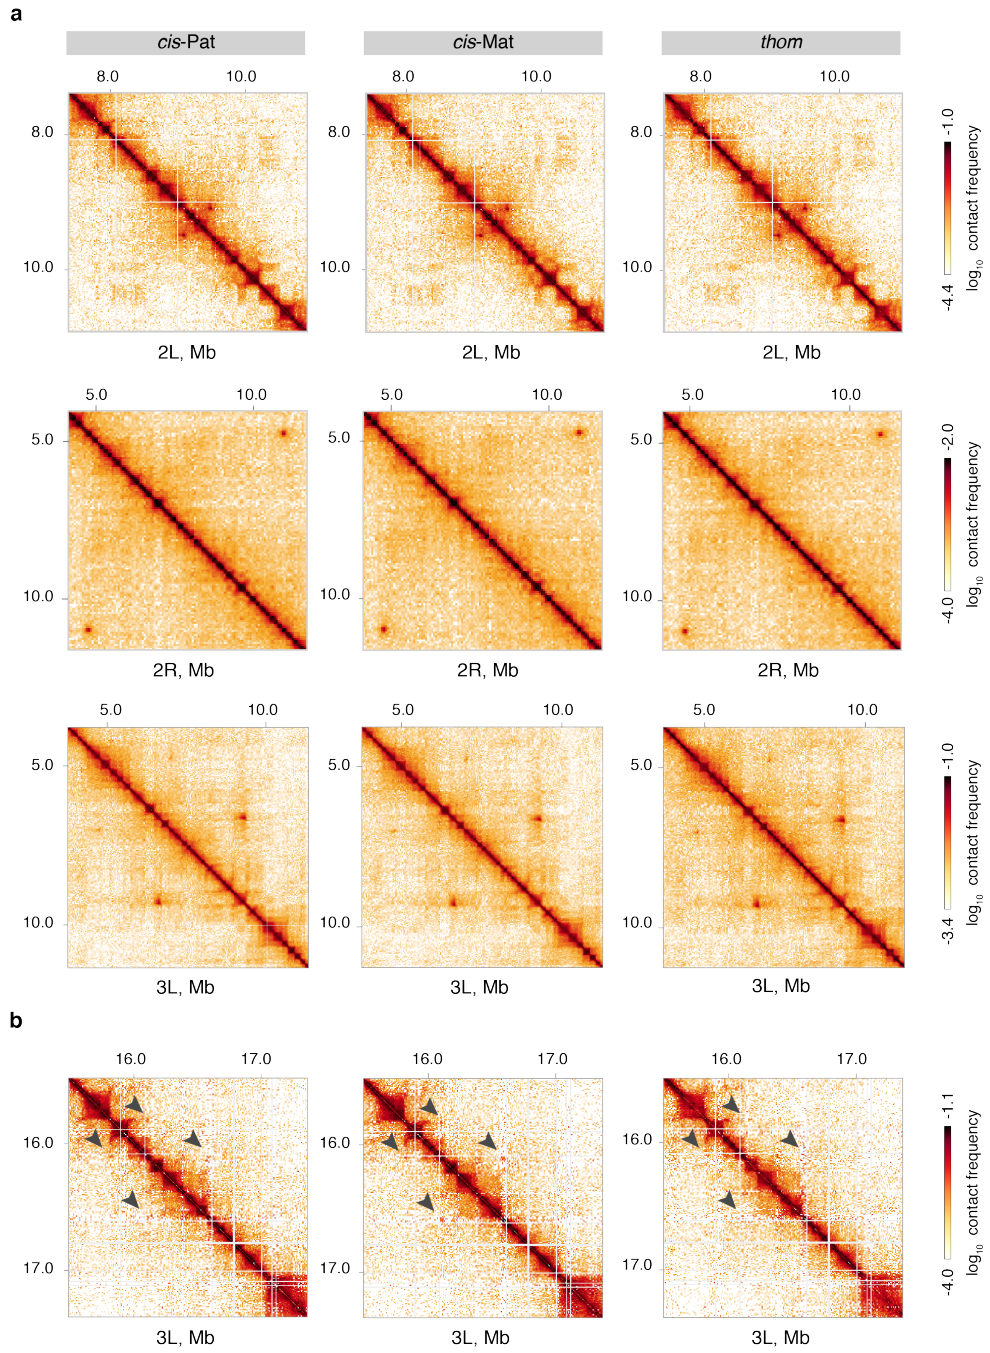

2

3 **Supplementary Figure 5. Examples of loops or long-range interaction peaks detected in *cis*-**

4 **paternal and maternal contact maps, as well as *thom* contact maps a, Examples in 2L, 2R,**

5 **and 3L chromosome arms b, Examples of loops not detected in all three maps.**

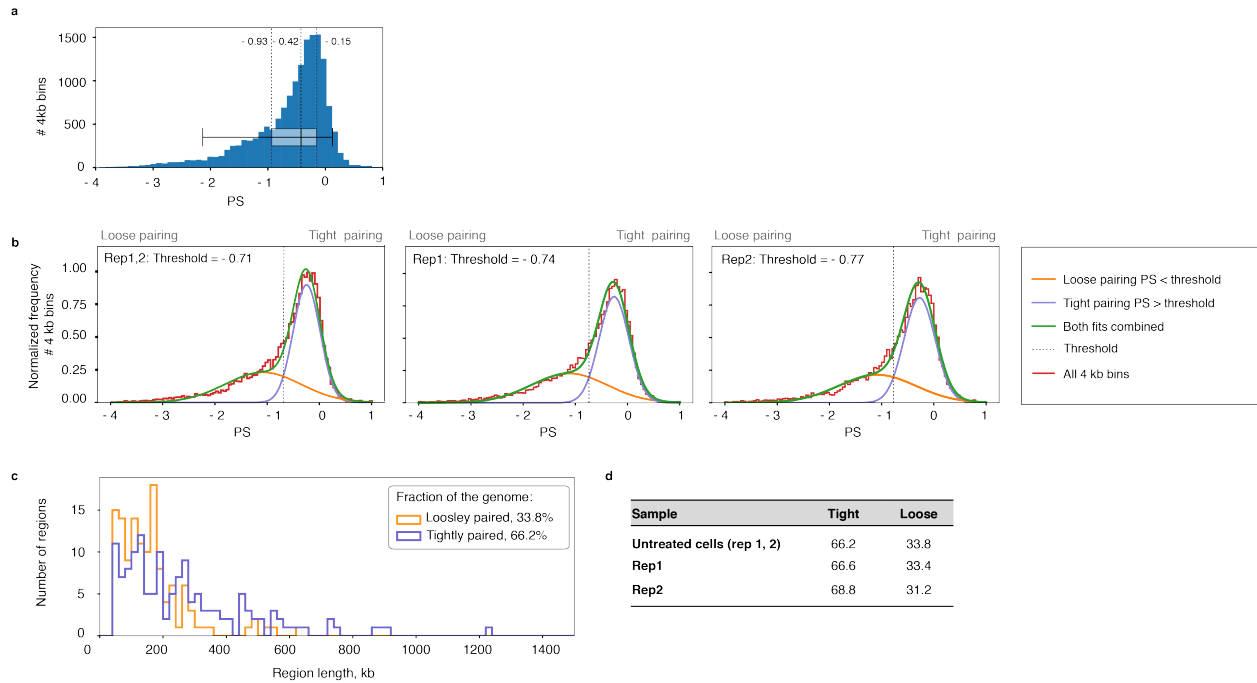

1

2

**Supplementary Figure 6. Pairing score distribution and breakdown into tight and loose**

3

**regions in PnM genome. a**, Genome-wide distribution of pairing score (PS) in PnM shows a

4

well-pronounced peak at higher values of PS and a tail extending into the lower values of PS. **b**,

5

We interpret the PS distribution with a model, where each bin can be either tightly or loosely

6

paired. We can separate the peak from the tail of the distribution by fitting it with a sum of two

7

Gaussians. Left panel: All genomic bins with PS < -0.71 are considered loosely paired (since

8

they are more likely to belong to the low-PS Gaussian) and the bins with PS > -0.71 are

9

considered tightly paired. Two right panels: the Gaussian fitting procedure and the resulting

10

thresholds were reproducible per replicate. **c**, The length distribution of loosely and tightly paired

11

regions. **d**, The breakdown of tight and loose pairing based on the threshold produced

12

comparable tight-to-loose ratios for each biological replicate.

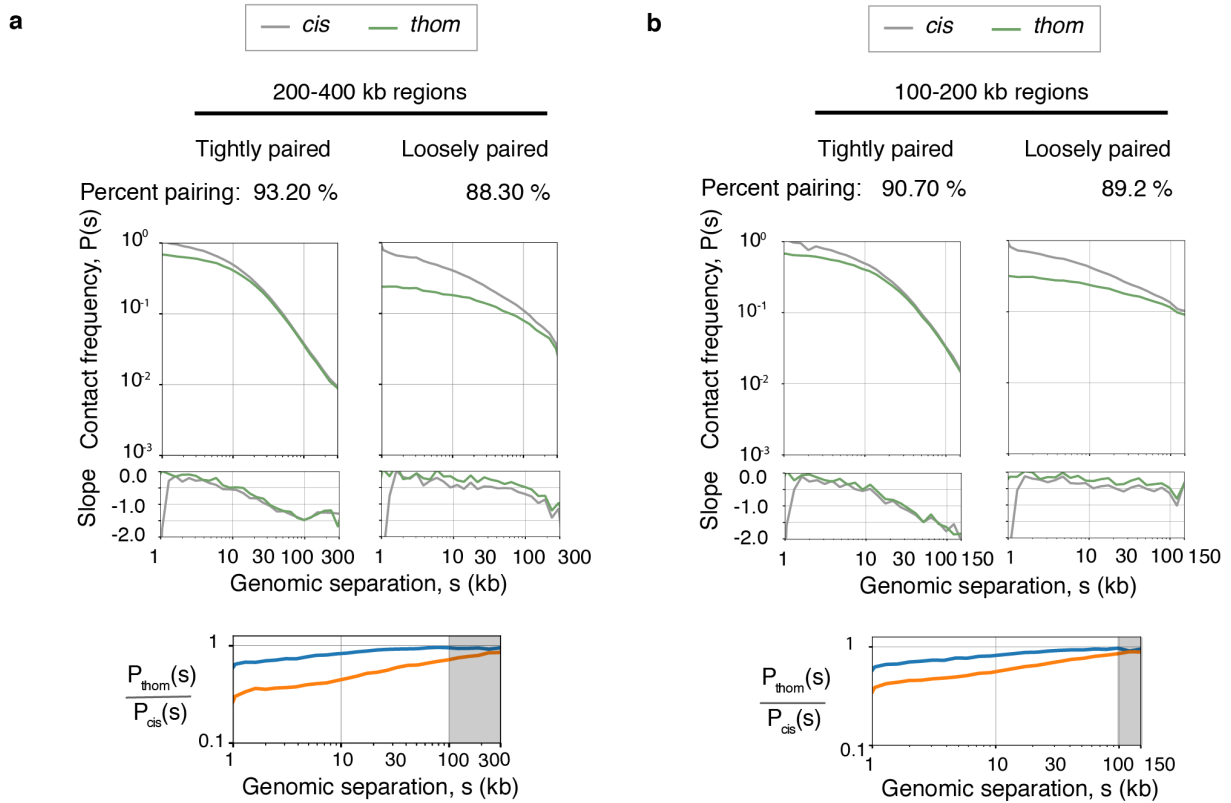

1

2 **Supplementary Figure 7.  $P_{thom}(s)$ ,  $P_{cis}(s)$  for tight and loose regions of different sizes.** Top,

3  $P_{thom}(s)$ ,  $P_{cis}(s)$ , middle, slope, and bottom, is  $P_{thom}(s)/P_{cis}(s)$  contact frequency within tightly and

4 loosely paired regions. **a**, 200-400 kb length and **b**, 100-200 kb length. In tightly paired regions,

5 *thom* and *cis* contact frequency curves show two modes of decay, shallow and steep, while in

6 loosely paired regions, the curves have only one, shallow mode. Shaded area shows the region

7 used to determine the percent pairing in **a**, by calculating the geometric mean of the  $P_{thom}(s)/$

8  $P_{cis}(s)$  at larger genomic separations (100-300 kb, or 100-150 kb).



1

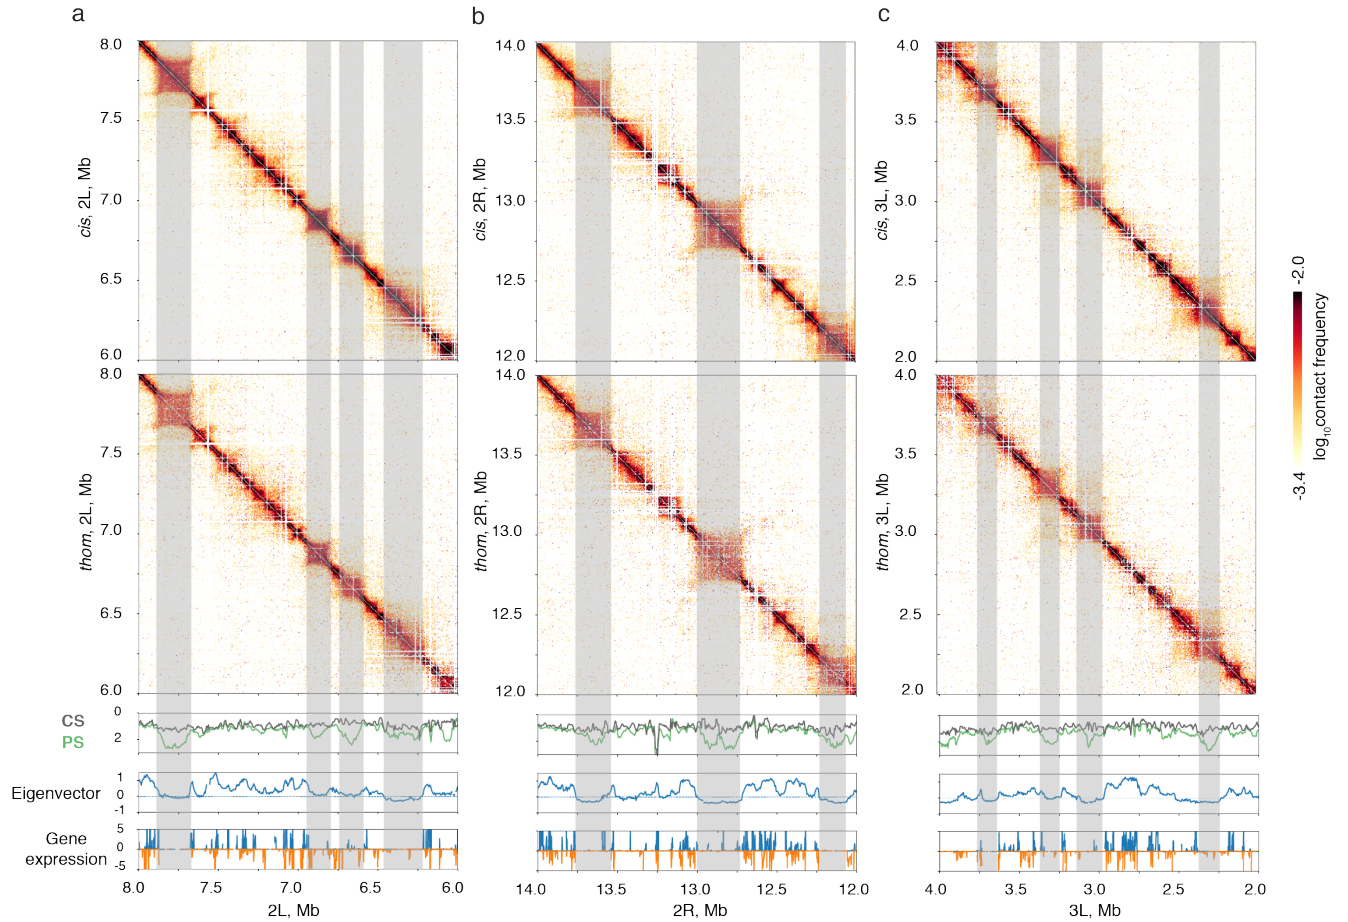

2

3

4

5

6

7

8

9

**Supplementary Figure 8. Representative examples of pairing relative to genomic compartment type and gene expression.** **a-c**, 2 Mb-long example regions described with *cis* and *trans*-homolog (*thom*) contact maps (two upper panels), pairing (PS) and *cis* scores (CS) (middle panel) and measures of transcriptional activity, eigenvector and RNA-seq (two lower panels). High PS correlates with high levels of gene expression, and enrichment of A-type compartments. Shaded area, shows some weakly paired regions, indicating a lower eigenvector rank, and generally lower expression levels. **a**, 2L, 6-8 Mb, **b**, 2R, 12-14 Mb and **c**, 3L, 2-4 Mb.

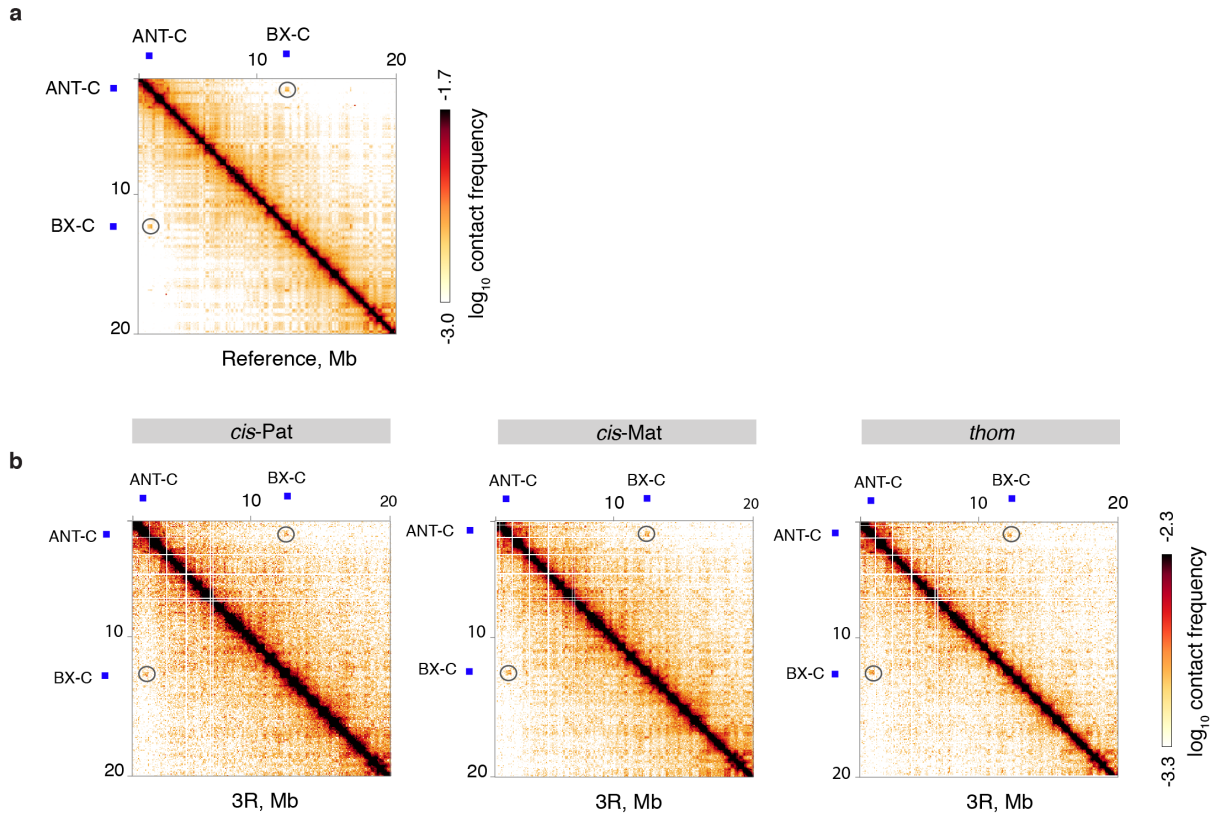

1

2

**Supplementary Figure 9. *Thom* interaction of ANT-C and BX-C. a,** Long-range *cis*-

3

interactions that were detected in previous studies between ANT-C and BX-C<sup>2,3</sup> are detected in

4

PnM reference map (non-allele-specific mapping), **b,** and *thom* and *cis* maps, indicating that this

5

well-known interaction in *cis*, is also detected in *thom* maps, and is within the same compartment

6

in our haplotype-maps.



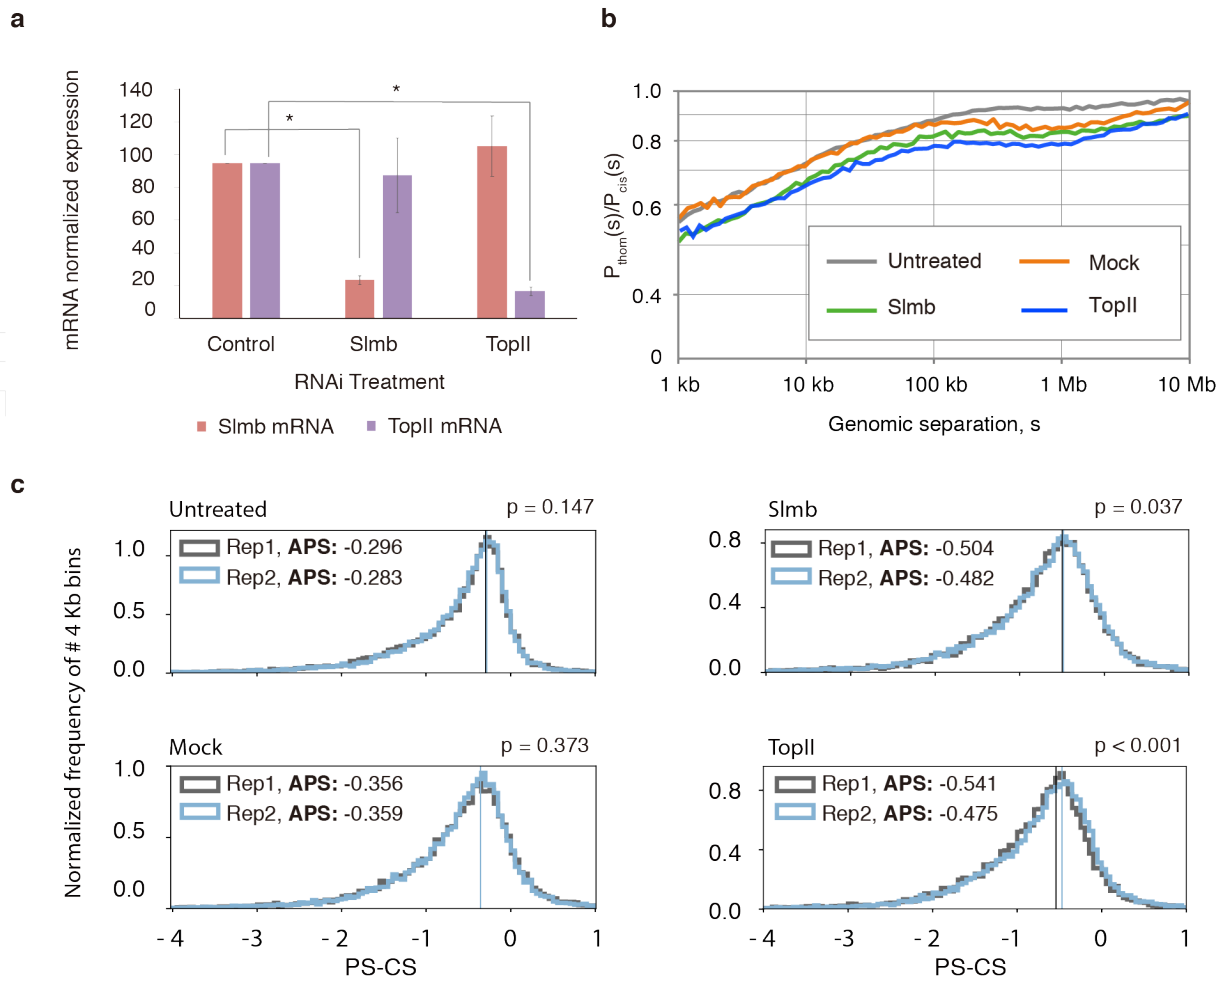

**Supplementary Figure 10. The effect of knocking down Slmb or TopII.** **a**, Quantitative PCR confirmed efficient knockdown of Slmb and TopII. The expression levels are normalized to Act5c and RP49 expression after RNAi in PnM cells. There is a significant drop in the levels of Slmb and TopII mRNA compared to the control mock treatment. Asterisks denote a significant reduction from control ( $P < 0.0001$ , unpaired t-test). S.d are shown for at least 3 biological replicates. **b**, The ratio of *thom*-to-*cis* contact frequency as a function of genomic separation,  $s$ , in Slmb, and TopII RNAi sample show a drop in *thom*-to-*cis* frequency compared to mock at distances below 100 kb and at all genomic separations compared to the untreated PnM cells. **c**, Aggregated pairing scores (APS) are reduced in Slmb and TopII RNAi samples compared to

1 untreated cells, and mock replicates, for two biological replicates as illustrated by a drop in the  
2 PS-CS distribution. P-values determined using bootstrapping (Supplementary methods).

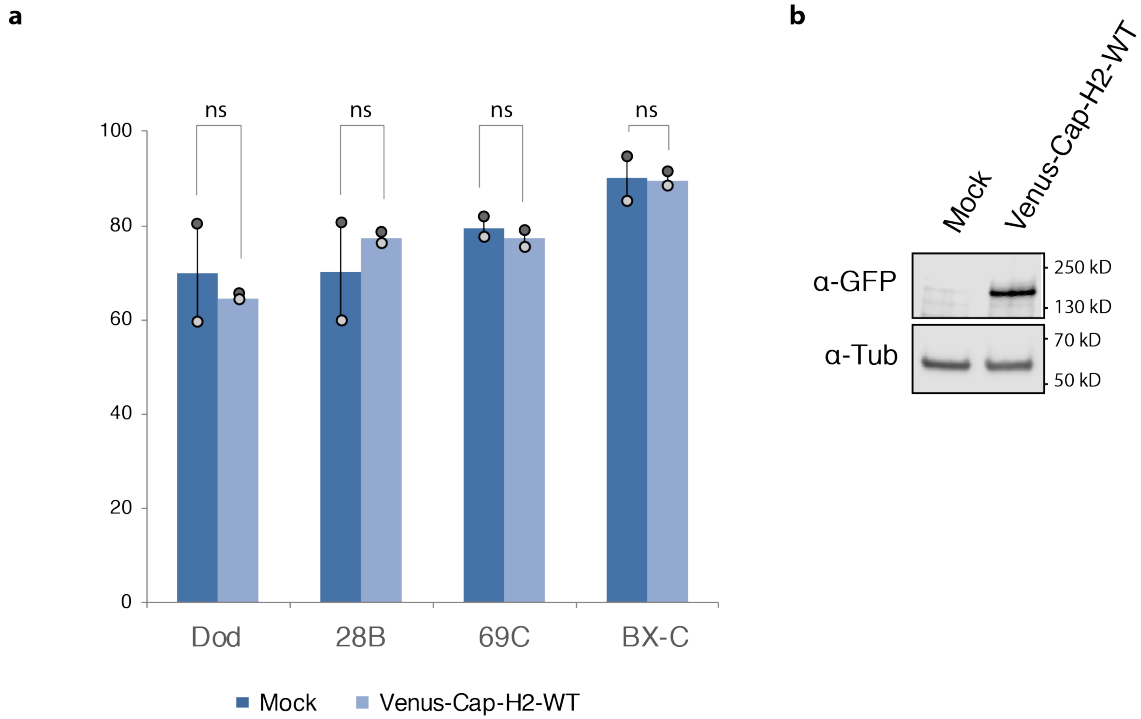

4

5 **Supplementary Figure 11. Overexpression of Cap-H2 in PnM a**, The effect of Cap-H2

6 overexpression on pairing as determined by FISH. Levels of pairing (quantified and displayed as

7 in Figure 1d, in PnM cells after transient expression of venus-Cap-H2-WT). (P =ns, non-

8 significant, unpaired t-test, error bars, s.d for two biological replicates; for N > 100

9 nuclei/replicate). **b**, Protein levels detected in the two samples, Mock, and venus-Cap-H2-WT.

10 Source data are provided as a Source Data file.

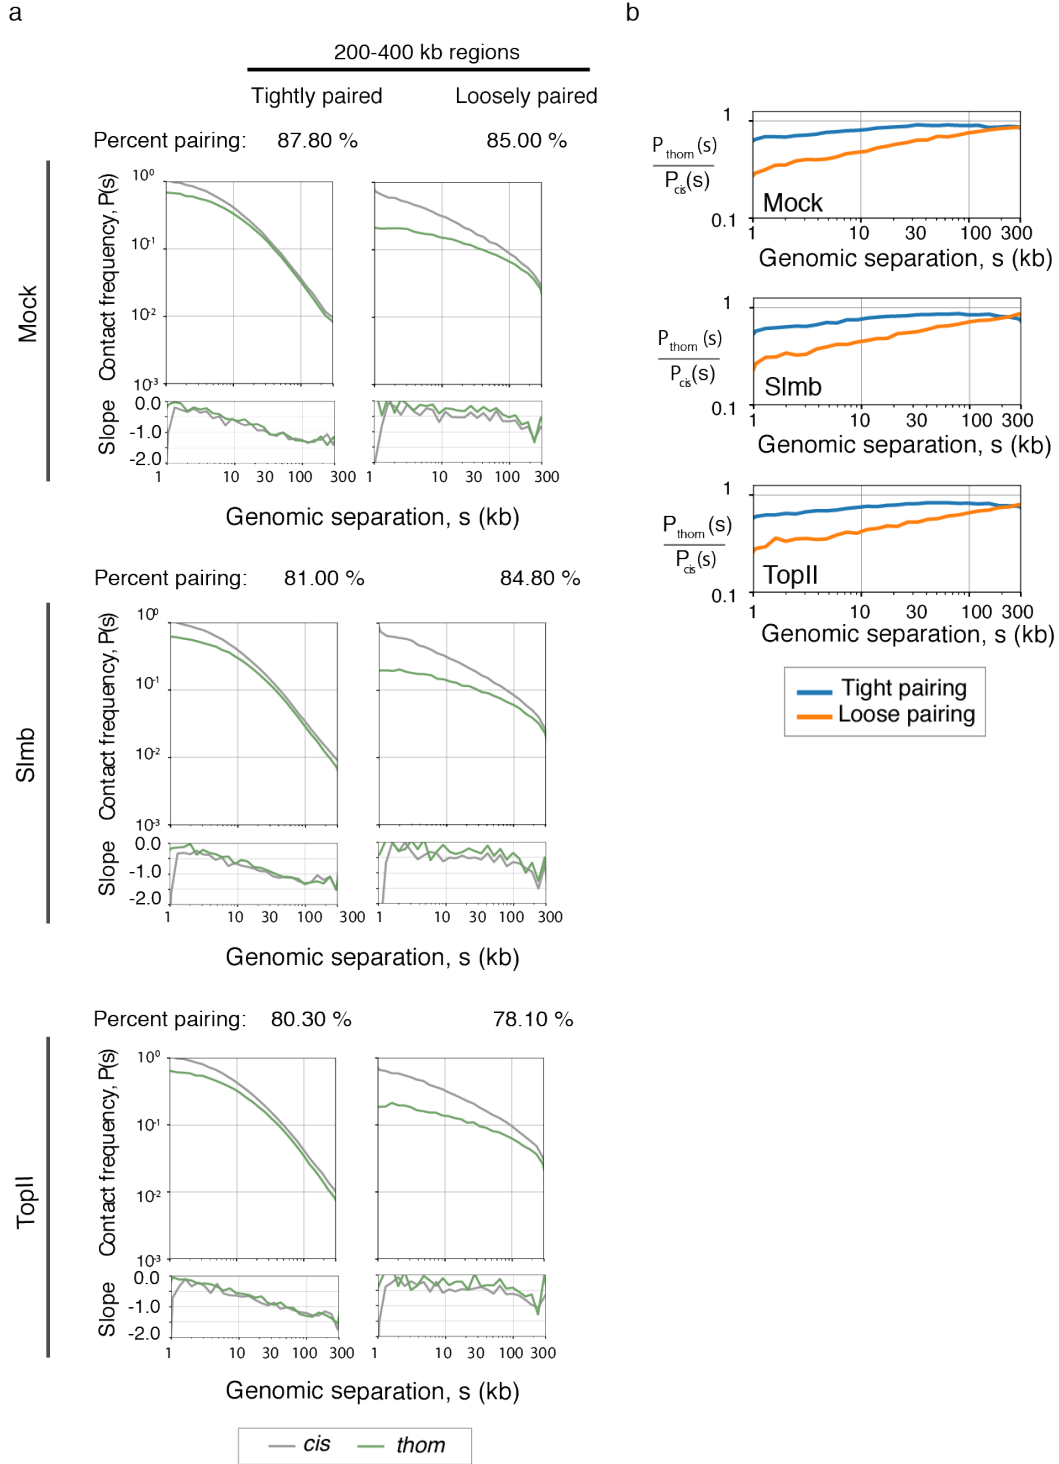

1

2 **Supplementary Figure 12. The effect of knocking down Slmb or TopII on 200-400 kb**

3 **regions of tight and loose pairing. a**, Top, plots of  $P(s)_{thom}$  and  $P(s)_{cis}$ , bottom, slopes, within

4 tightly (left) and loosely paired (right) regions of 200-400 kb length. **b**,  $P(s)_{thom} / P(s)_{cis}$  relative

1 to genomic separation,  $s$ , in tightly and loosely paired regions. Shaded area shows the region  
2 used to determine the percent pairing in **a**, by calculating the geometric mean of the  $P(s)_{thom} /$   
3  $P(s)_{cis}$  at larger genomic separations of 100-300 kb. A comparison between tight and loose  
4 pairing *thom* and *cis* contact frequency shows a drop in both tight and loose pairing for Slmb and  
5 TopII relative to untreated cells.

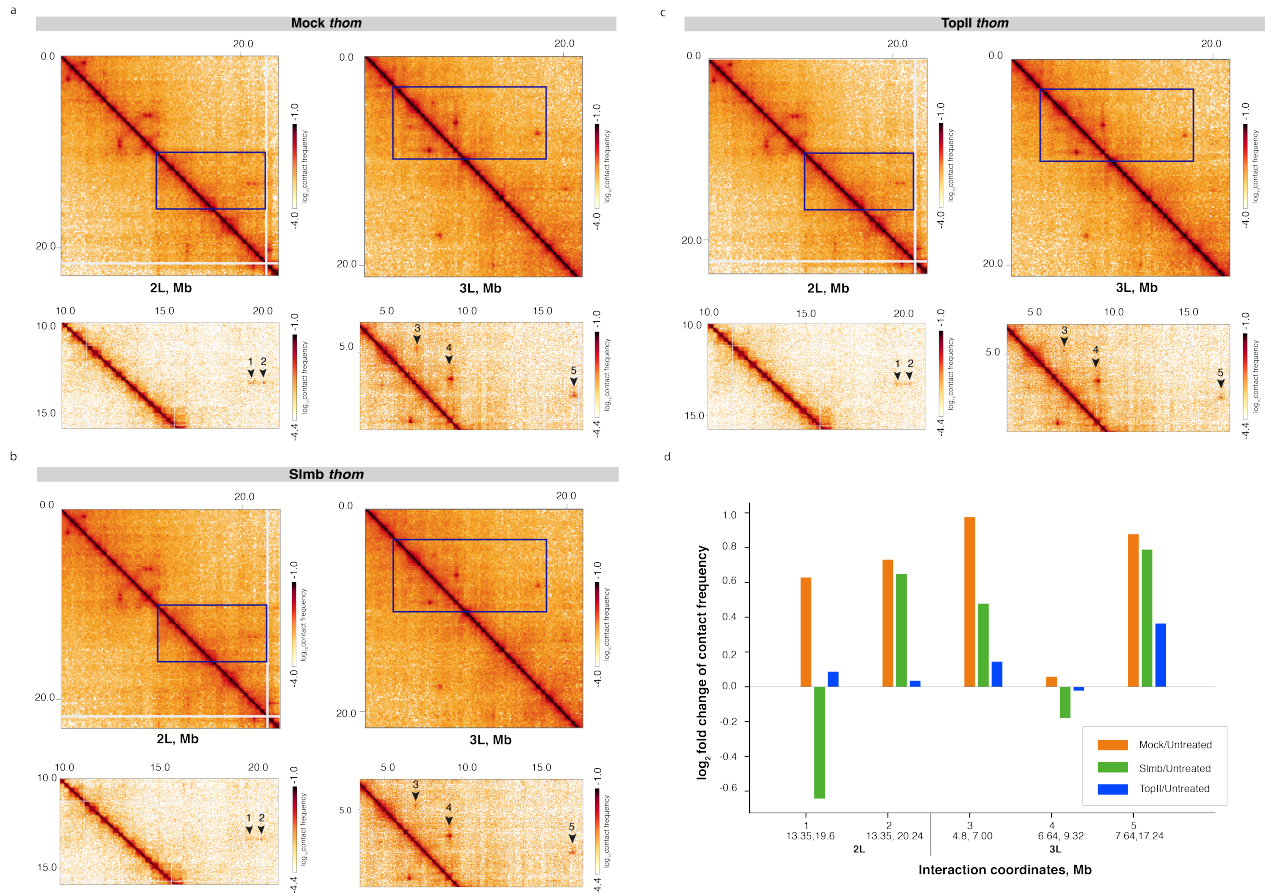

1  
2  
3  
4  
5  
6  
7  
8

**Supplementary Figure 13. *Thom* contact maps for Mock, Slmb or TopII conditions a-c, 2L and 3L whole chromosome arm *thom* contact maps (top) for **a**, Mock, **b**, Slmb RNAi, **c**, TopII RNAi, and zoom-ins (bottom). Arrows point to long range contacts numbered 1-5, some of which are reduced in the knockdowns as compared to mock. **d**, Quantification of the interactions labeled 1-5 in the *thom* maps (a-c) relative to untreated samples. The contact frequency at each interaction peak was calculated as the sum of the Iteratively Corrected Contact Frequency in a 120 kb x120 kb window surrounding it.**

1

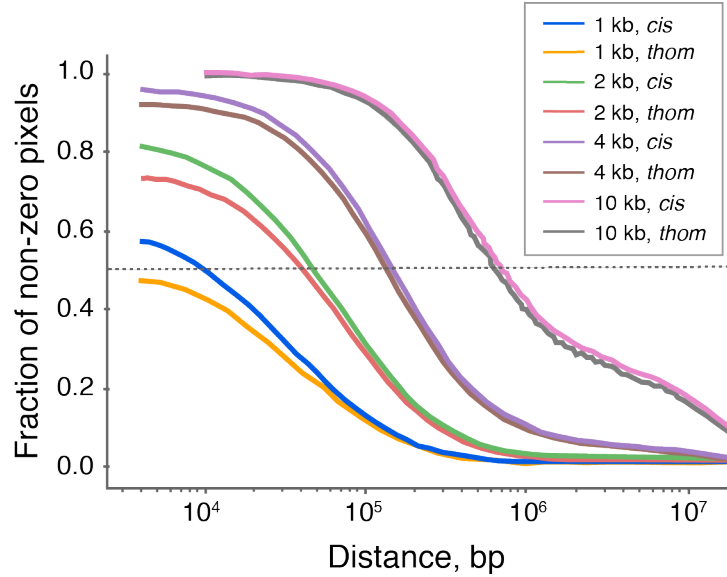

2

3 **Supplementary Figure 14. Determining optimal resolution for *cis* and *thom* contact maps.**

4 The curves show the fraction of non-zero pixels (y-axis) at various genomic separations (x-axis)  
5 in *cis* and *thom* contact maps of various resolutions. We find that the 4 kb resolution maps have  
6 <50% empty pixels (the horizontal dashed line) at genomic separations corresponding to the  
7 TAD interactions (<~100kb).

1 **Supplementary Tables**

2

| Chrom | Chrom size | Indels |      |       | SNVs  |       |       | het<br>SNVs/kb |
|-------|------------|--------|------|-------|-------|-------|-------|----------------|
|       |            | #057   | #439 | hom   | #057  | #439  | hom   |                |
| chr2L | 23011544   | 5820   | 5910 | 9415  | 66894 | 70989 | 68091 | 5.99           |
| chr2R | 21146708   | 5144   | 5396 | 8828  | 55659 | 58689 | 60606 | 5.41           |
| chr3L | 24543557   | 6068   | 5599 | 10374 | 67299 | 64261 | 73011 | 5.36           |
| chr3R | 27905053   | 6494   | 6402 | 9676  | 66777 | 68709 | 65627 | 4.86           |
| chr4  | 1351857    | 1      | 4    | 136   | 2     | 15    | 929   | 0.01           |
| chrX  | 22422827   | 8405   | 8386 | 5193  | 40674 | 44055 | 38063 | 3.78           |

3

4 **Supplementary Table 1.** Summary of SNV frequency per chromosome

|                                                               | Untreated | RNAi Treatment |        |        |
|---------------------------------------------------------------|-----------|----------------|--------|--------|
|                                                               | PnM       | Mock           | Slmb   | TopII  |
| <b>Total reads (x1e6)</b>                                     | 604.12    | 167.46         | 158.14 | 164.81 |
| <b>Total non-haplotype-specific mapped reads (x1e6)</b>       | 411.00    | 116.87         | 108.68 | 115.22 |
| <b>% Non-haplotype-specific mappability</b>                   | 68.03     | 69.79          | 68.72  | 69.91  |
| <b>Total haplotype-specific mapped reads (x1e6)</b>           | 75.38     | 23.12          | 21.51  | 22.98  |
| <b>% Haplotype-specific mappability</b>                       | 12.48     | 13.80          | 13.60  | 13.94  |
| <b><i>Cis</i> reads (x1e6)</b>                                | 55.44     | 16.86          | 15.80  | 17.09  |
| <b><i>Trans</i> reads (x1e6)</b>                              | 19.95     | 6.25           | 5.72   | 5.89   |
| <b>Ratio <i>cis:trans</i></b>                                 | 2.78      | 2.70           | 2.76   | 2.90   |
| <b>% <i>Cis</i> of total sequenced reads</b>                  | 9.18      | 10.07          | 9.54   | 10.37  |
| <b>% <i>Trans</i> of total sequenced reads</b>                | 3.30      | 3.73           | 3.62   | 3.57   |
| <b>Total haplotype-specific mapped reads without X (x1e6)</b> | 45.95     | 14.08          | 13.16  | 13.89  |

1

2 **Supplementary Table 2.** Summary of non-haplotyped (reference-mapped), and haplotype-  
3 specific read pairs recovered for untreated PnM and RNAi treated cells, with two biological  
4 replicates merged per sample.



| ChIP-seq         | Percent boundaries overlapping ChIP peaks | Correlation ChIP-seq fold change over input vs pairing score, $r_s$ | Cell type | Accession number                                                     |
|------------------|-------------------------------------------|---------------------------------------------------------------------|-----------|----------------------------------------------------------------------|
| <b>Nup98</b>     | 70.7                                      | 0.467                                                               | Kc167     | <a href="#">GSM2133770</a>                                           |
| <b>RNAPII</b>    | 71.1                                      | 0.462                                                               | Kc167     | <a href="#">GSM1536014</a>                                           |
| <b>GAF</b>       | 25.8                                      | 0.459                                                               | Kc167     | <a href="#">GSM2133762</a>                                           |
| <b>GAF</b>       | 54.7                                      | 0.310                                                               | Kc167     | <a href="#">GSM1318358</a>                                           |
| <b>GAF</b>       | 41.4                                      | 0.116                                                               | S2        | <a href="#">GSM998826</a>                                            |
| <b>BEAF</b>      | 58.4                                      | 0.452                                                               | Kc167     | <a href="#">GSM1535963</a>                                           |
| <b>BEAF</b>      | 52.8                                      | 0.277                                                               | Kc167     | <a href="#">GSM807545</a>                                            |
| <b>BEAF</b>      | 50.4                                      | 0.250                                                               | Kc167     | <a href="#">GSM762845</a>                                            |
| <b>Cap-H2</b>    | 59.6                                      | 0.449                                                               | Kc167     | <a href="#">GSM1535966</a> , <a href="#">67</a>                      |
| <b>TFIIIC</b>    | 50.1                                      | 0.448                                                               | Kc167     | <a href="#">GSM1536019</a> , <a href="#">20</a>                      |
| <b>Mrg15</b>     | 48.1                                      | 0.439                                                               | S2        | <a href="#">GSM2443790</a> , <a href="#">91</a>                      |
| <b>Fs1h</b>      | 32.5                                      | 0.422                                                               | Kc167     | <a href="#">GSM1535987</a> , <a href="#">88</a>                      |
| <b>Mod</b>       | 32.9                                      | 0.388                                                               | Kc167     | <a href="#">GSM892321</a> , <a href="#">22</a>                       |
| <b>CP190</b>     | 77.6                                      | 0.384                                                               | Kc167     | <a href="#">GSM1535980</a>                                           |
| <b>CP190</b>     | 77.1                                      | 0.342                                                               | Kc167     | <a href="#">GSM807541</a>                                            |
| <b>CP190</b>     | 76.9                                      | 0.184                                                               | Kc167     | <a href="#">GSM762836</a>                                            |
| <b>CBP</b>       | 78.4                                      | 0.372                                                               | Kc167     | <a href="#">GSM1535970</a> , <a href="#">71</a>                      |
| <b>ZIPIC</b>     | 66.3                                      | 0.368                                                               | Kc167     | <a href="#">GSM2133769</a>                                           |
| <b>Cohesin</b>   | 76.1                                      | 0.348                                                               | Kc167     | <a href="#">GSM1536009</a> , <a href="#">10</a> , <a href="#">11</a> |
| <b>Ibf2</b>      | 45.1                                      | 0.308                                                               | Kc167     | <a href="#">GSM2133766</a>                                           |
| <b>Ibf1</b>      | 54.8                                      | 0.287                                                               | Kc167     | <a href="#">GSM2133767</a>                                           |
| <b>Pita</b>      | 40.0                                      | 0.281                                                               | Kc167     | <a href="#">GSM2133768</a>                                           |
| <b>Chromator</b> | 45.3                                      | 0.280                                                               | Kc167     | <a href="#">GSM1318357</a>                                           |
| <b>Chromator</b> | 53.5                                      | 0.250                                                               | Kc167     | <a href="#">GSM1535975</a> , <a href="#">76</a>                      |
| <b>CTCF</b>      | 23.9                                      | 0.208                                                               | Kc167     | <a href="#">GSM807543</a>                                            |
| <b>CTCF</b>      | 51.9                                      | 0.174                                                               | Kc167     | <a href="#">GSM762842</a>                                            |
| <b>CTCF</b>      | 13.6                                      | -0.068                                                              | Kc167     | <a href="#">GSM1535983</a>                                           |
| <b>DREF</b>      | 36.5                                      | 0.200                                                               | Kc167     | <a href="#">GSM1535984</a> , <a href="#">85</a>                      |
| <b>DREF</b>      | 46.8                                      | -0.149                                                              | Kc167     | <a href="#">GSM977023</a> , <a href="#">24</a>                       |
| <b>Su(Hw)</b>    | 50.3                                      | 0.057                                                               | Kc167     | <a href="#">GSM762839</a>                                            |

1

2

**Supplementary Table 3.** The summary of the overlap between PnM boundaries and ChIP-seq

3

peaks from published data sets, and their correlation with tight pairing. ChIP-seqs are arranged

4

based on their correlation coefficient ( $r_s$ , Spearman's), red to blue color assigned from highest

- 1 (0.467) to lowest (-0.149)  $r_s$  values . All reported correlations have p-values  $P < 0.0001$ .
- 2 Discrepancies in the correlations for the same protein across different data sets could be due
- 3 antibody quality, type of cells used, or different cell batches used in different labs.

1

| Locus        | Quadrant | Expression in PnM | Pairing      | Assays confirming transvection                                                                            |
|--------------|----------|-------------------|--------------|-----------------------------------------------------------------------------------------------------------|
| <i>dpp</i>   | 1        | yes               | tight        | <i>trans</i> -allelic complementation <sup>4</sup>                                                        |
| <i>eya</i>   | 1,2      | yes/low           | tight        | <i>trans</i> -allelic complementation <sup>5</sup>                                                        |
| <i>Gpdh1</i> | 2        | no                | tight        | <i>trans</i> -allelic complementation <sup>6</sup>                                                        |
| <i>esg</i>   | 3,4      | yes/low           | loose        | transgene insertion at endogenous locus and PSS <sup>7</sup>                                              |
| <i>ap</i>    | 1        | yes               | tight        | <i>trans</i> -allelic complementation <sup>8</sup>                                                        |
| <i>eve</i>   | 2        | no                | tight        | <i>trans</i> -homing, transgene insertion, PSS, LacZ expression <sup>9</sup> , H3C <sup>10</sup>          |
| <i>inv</i>   | 3,4      | yes/low           | loose        | transgene insertion, PSS, LacZ expression in discs <sup>11</sup>                                          |
| <i>en</i>    | 1        | yes               | tight        | transgene insertion, PSS, LacZ expression in embryos, imaginal discs, p-element homing <sup>7,12,13</sup> |
| <i>vg</i>    | 1        | yes               | tight        | <i>trans</i> -allelic complementation <sup>14</sup> , transgene insertion <sup>15</sup>                   |
| <i>mbl</i>   | 1,2      | yes/low           | tight        | <i>trans</i> -allelic complementation <sup>16</sup>                                                       |
| <i>Men</i>   | 1,2      | no                | tight        | <i>trans</i> -allelic complementation <sup>17,18</sup>                                                    |
| <i>bw</i>    | 1,2      | yes/low           | tight        | transgene insertion, PEV, PSS <sup>19-22</sup>                                                            |
| <i>Scr</i>   | 1,2      | no                | tight        | <i>trans</i> -allelic complementation <sup>23,24</sup>                                                    |
| <i>ss</i>    | 2        | no                | tight        | transgene insertion and expression in photoreceptors <sup>25</sup>                                        |
| <i>Ubx</i>   | 2,3      | very low          | tight, loose | <i>trans</i> -allelic complementation <sup>26-29</sup>                                                    |
| <i>abd-A</i> | 2,3      | very low          | tight, loose | <i>trans</i> -allelic complementation, transgene insertion, PSS, LacZ expression <sup>30</sup>            |
| <i>Abd-B</i> | 2        | very low          | tight        | <i>trans</i> -allelic complementation <sup>30-33</sup>                                                    |

2

3 **Supplementary Table 4.** Examples of known transvected loci on the autosomes and their  
4 location in Fig. 3d. Quadrant 1, and 2, represents regions in the genome that are tightly paired  
5 and are expressed or not expressed at all, respectively. \*Pairing sensitive silencing (PSS), high  
6 resolution chromosome conformation capture (H3C), position effect variegation (PEV). *The*  
7 *summary of loci above includes at least one endogenous locus study, or endogenous locus*  
8 *regulatory region.*

| Assay                                                    | Slmb    | TopII   |
|----------------------------------------------------------|---------|---------|
| qPCR showing mRNA depletion vs. mock                     | 75.2 %  | 82.5 %  |
| Average FISH drop in colocalization vs. mock             | 18.47 % | 14.07 % |
| Average FISH drop in colocalization vs. untreated sample | 30.16 % | 27.35 % |
| APS change vs. mock                                      | 9.46 %  | 8.95 %  |
| APS change vs. untreated sample                          | 13.29 % | 12.80 % |

1

2

**Supplementary Table 5.** Summary of different pairing assays for Slmb and TopII knockdown

3

samples relative to mock sample. APS: aggregated pairing score.

| <b>Probe target</b> | <b>dm3 Coordinates</b>       | <b>OligoLibraryID</b> | <b>Total # probes</b> | <b>Target size (Mb)</b> | <b>Secondary oligo ID used</b> |
|---------------------|------------------------------|-----------------------|-----------------------|-------------------------|--------------------------------|
| <b>28B</b>          | chr2L: 7,256,488-7,936,487   | Mycroarray-6151       | 10000                 | 0.680                   | Sec5                           |
| <b>69C</b>          | chr3L: 12,170,682-12,844,681 | Mycroarray-6150       | 10000                 | 0.674                   | Sec1                           |
| <b>BX-C</b>         | chr3R: 12,482,502-12,797,965 | Mycroarray-6010       | 2394                  | 0.316                   | Sec6                           |
| <b>16E</b>          | chrX: 17,406,557-18,106,556  | Mycroarray-6148       | 10000                 | 0.700                   | Sec6                           |
| <b>HOPs 2L</b>      | chr2L:10,731-1,999,862       | Mycroarray            | 2410                  | 2.000                   | 2L-057: Sec6, 2L-439: Sec5     |
| <b>HOPs 3L</b>      | chr3L: 19,809-1,999,387      | Mycroarray            | 2304                  | 2.000                   | 3L-057: Sec6, 3L-439: Sec5     |

1

2 **Supplementary Table 6. Oligopaints probe target library summary**

| Name           | Primer (5'-3')                                         |
|----------------|--------------------------------------------------------|
| 28B-F          | TAGCGCAGGAGGTCCACGACGTGCAAGGGTGTCGCTCGGTCTCCGTTTCGTCTC |
| 28B-R          | TAATACGACTCACTATAGGGGGGCTAGGTACAGGGTTCAGC              |
| 69C-F          | CACCGACGTGCGATAGAACGGAAGAGCGTGTGCGCTCGGTCTCCGTTTCGTCTC |
| 69C-R          | TAATACGACTCACTATAGGGGGGCTAGGTACAGGGTTCAGC              |
| BX-C-F         | CACACGCTCTCCGTCTTGGCCGTGGTCGATCAGTATCGTGCAAGGGTGAATGC  |
| BX-C-R         | TAATACGACTCACTATAGGGGAGCAGTCACAGTCCAGAAGG              |
| 16E-F          | CACACGCTCTCCGTCTTGGCCGTGGTCGATCACGCTCGGTCTCCGTTTCGTCTC |
| 16E-R          | TAATACGACTCACTATAGGGGGGCTAGGTACAGGGTTCAGC              |
| HOPs-057c-2L-F | CACACGCTCTCCGTCTTGGCCGTGGTCGATCAATGCGTTCGGTCTCCGTCAAC  |
| HOPs-057c-2L-R | TAATACGACTCACTATAGGGAATCGCGACGTGTGATGGAAC              |
| HOPs-057w-2L-F | CACACGCTCTCCGTCTTGGCCGTGGTCGATCAATTTGTGACCCCGAGTCGAAC  |
| HOPs-057w-2L-R | TAATACGACTCACTATAGGGAACCGGTCGGGATTCGTAAC               |
| HOPs-439c-2L-F | TAGCGCAGGAGGTCCACGACGTGCAAGGGTGTAAACATACGCCTCGGGTTGGAC |
| HOPs-439c-2L-R | TAATACGACTCACTATAGGGAGTGTGCGTTCGGCCAGAAAC              |
| HOPs-439w-2L-F | TAGCGCAGGAGGTCCACGACGTGCAAGGGTGTACCCGATACGTCGTGGGATTC  |
| HOPs-439w-2L-R | TAATACGACTCACTATAGGGACTCGGCGTCTTCCGACGATG              |
| HOPs-057c-3L-F | CACACGCTCTCCGTCTTGGCCGTGGTCGATCAACCGGGTCCCGTACATTTGCC  |
| HOPs-057c-3L-R | TAATACGACTCACTATAGGGATGGTAACGCAACGGATCTCG              |
| HOPs-057w-3L-F | CACACGCTCTCCGTCTTGGCCGTGGTCGATCAACATTCGCGCACGCTAATGTC  |
| HOPs-057w-3L-R | TAATACGACTCACTATAGGGAAGCGGCGTTTCGACACCTTTG             |
| HOPs-439c-3L-F | TAGCGCAGGAGGTCCACGACGTGCAAGGGTGTAGAGGGCGGTGCGGTAATAAG  |
| HOPs-439c-3L-R | TAATACGACTCACTATAGGGACCGTCAGGTTCGACGCTACAC             |
| HOPs-439w-3L-F | TAGCGCAGGAGGTCCACGACGTGCAAGGGTGTAAAGGAGCGTCCGCACCGAATG |
| HOPs-439w-3L-R | TAATACGACTCACTATAGGGACATTGGGTGCGATGACGAAC              |

1

2 **Supplementary Table 7.** PCR primers for amplifying Oligopaints libraries

| Target       | flyRNAi ID# |     | Primer (5'-3')                              |
|--------------|-------------|-----|---------------------------------------------|
| <b>Slmb</b>  | DRSC32609   | Fwd | TAATACGACTCACTATAGGGAGAAAGCAGGAGCCGGTGAA    |
|              |             | Rev | TAATACGACTCACTATAGGGAGACAAAAGGCATCTGGTCTTCT |
| <b>TopII</b> | DRSC03459   | Fwd | TAATACGACTCACTATAGGGTTTGCCAGAGCGATATCTC     |
|              |             | Rev | TAATACGACTCACTATAGGGCCATAGTGGCTCGATCTTTT    |

1

2 **Supplementary Table 8.** dsRNA synthesis primers

| <b>Name</b>    | <b>Primer (5'-3')</b> |
|----------------|-----------------------|
| <b>Act5C-F</b> | CACCGGTATCGTTCTGGACT  |
| <b>Act5C-R</b> | AGGGCAACATAGCACAGCTT  |
| <b>RP49-F</b>  | CCGCTTCAAGGGACAGTATC  |
| <b>RP49-R</b>  | GACAATCTCCTTGCGCTTCT  |
| <b>Slmb-F</b>  | ACACCCTTATCCACCACTGC  |
| <b>Slmb-R</b>  | CAAAGTCCACCACATTGACG  |
| <b>TopII-F</b> | CGCAAGTCAAGCAAGATCAA  |
| <b>TopII-R</b> | GCTTCCC GCACATTTAGAAG |

1

2 **Supplementary Table 9.** qPCR primers



1

|                                                        | <b>PnM genome</b> | <b>Maternal genome (DGRP-057)</b> | <b>Paternal genome (DGRP-439)</b> |
|--------------------------------------------------------|-------------------|-----------------------------------|-----------------------------------|
| Number of raw read pairs                               | 154,862,547       | 63,470,151                        | 62,515,671                        |
| Number of mapped, paired, and de-duplicated read pairs | 131,879,436       | 58,974,713                        | 58,287,559                        |

2

3 **Supplementary Table 10.** Summary of the number of read pairs recovered from sequencing the  
4 PnM hybrid, maternal, and paternal genome libraries and used for phasing the hybrid-haplotype  
5 PnM genome and determining SNVs *de novo*.

| Type of reads                | Rep1       | Rep2       |
|------------------------------|------------|------------|
| <i>cis</i>                   | 27,500,435 | 28,017,074 |
| <i>cis</i> 3kb               | 16,314,399 | 16,908,792 |
| <i>cis</i> 10kb              | 14,978,208 | 15,590,307 |
| <i>cis</i> 100kb             | 10,247,013 | 10,738,792 |
| <i>cis</i> 2L, 2R, 3L        | 10,467,549 | 10,608,473 |
| <i>cis</i> 2L, 2R, 3L 3kb    | 4,927,548  | 5,105,874  |
| <i>cis</i> 2L, 2R, 3L 10kb   | 4,405,081  | 4,590,017  |
| <i>cis</i> 2L, 2R, 3L 100kb  | 2,692,950  | 2,837,605  |
| <i>thom</i>                  | 5,822,100  | 6,034,950  |
| <i>thom</i> 3kb              | 5,548,717  | 5,769,358  |
| <i>thom</i> 10kb             | 5,097,220  | 5,322,011  |
| <i>thom</i> 100kb            | 3,299,001  | 3,478,983  |
| <i>thom</i> 2L, 2R, 3L       | 4,466,718  | 4,629,258  |
| <i>thom</i> 2L, 2R, 3L 3kb   | 4,254,561  | 4,423,056  |
| <i>thom</i> 2L, 2R, 3L 10kb  | 3,901,426  | 4,072,986  |
| <i>thom</i> 2L, 2R, 3L 100kb | 2,516,559  | 2,652,904  |
| <i>thet</i>                  | 3,961,794  | 4,413,743  |

1

2 **Supplementary Table 11.** Breakdown of haplotype-resolved read pairs at different genomic  
3 separation per replicate. *thom*: *trans* homologous, *thet*: *trans* heterologous

4

5

6

7

8

9

10

11

12

## Supplementary Note 1

### Dividing the genome into regions of tight and loose pairing, and $P(s)^{\text{tight}}$ and $P(s)^{\text{loose}}$ curves

For each type of pairing, we calculated  $P(s)$  curves over large regions with a relatively narrow size range of 200-400 kb, or 100-200 kb (Supplementary Fig. 7). Within 200-400 kb tightly paired regions, the  $P_{\text{cis}}(s)$  and  $P_{\text{thom}}(s)$  curves showed two modes: (i) a shallow mode at shorter separations  $< 30\text{kb}$ , where  $P_{\text{thom}}(s)$  was noticeably lower than  $P_{\text{cis}}(s)$  (at 1-3 kb,  $P_{\text{thom}}(s)/P_{\text{cis}}(s)$  is 0.66), and where both decayed relatively slowly with distance ( $P(s) \sim s^\alpha$ ,  $\alpha \sim 0.25-0.5$ ); and (ii) a steep mode at larger separations  $> 30\text{ kb}$ , where the two curves were almost equal ( $P_{\text{thom}}(s)/P_{\text{cis}}(s) = 0.93$ ) and decayed more rapidly ( $P(s) \sim s^\alpha$ ,  $\alpha \sim 1.0-1.5$ ) (Fig. 2h, left panel). In loosely paired regions,  $P_{\text{thom}}(s)$  and  $P_{\text{cis}}(s)$  had only one shallow mode, where  $P_{\text{thom}}(s) < P_{\text{cis}}(s)$  at all separations, (Fig. 2h, right panel); and both curves decayed slowly ( $P(s) \sim s^\alpha$ ,  $\alpha \sim 0.25-0.5$ ). We observed similar behavior of  $P_{\text{cis}}(s)$  and  $P_{\text{thom}}(s)$  in regions of 100-200 kb (Supplementary Fig. 7b).

In *cis*, the existence of the shallow mode in the  $P_{\text{cis}}(s)$  curves reflects formation of domains, as the slow decay of contact frequency with distance (100X increase in distance leads to only 10X drop in contact frequency) is inconsistent with random folding of the chromatin<sup>34,35</sup>. Importantly, the transition into the steep mode occurs at the average domain size<sup>34</sup>. Thus, our results suggested that an individual tightly paired region in *cis* consists of a series of smaller domains ( $\sim 10-30\text{ Kb}$ ), while an individual loosely paired region could correspond to a single domain.

1  
2 We used the deviation of  $P_{thom}(s)$  from  $P_{cis}(s)$  in tightly and loosely paired regions to infer  
3 the precision of homologous pairing. If two homologous chromosomes were connected with  
4 each other at every base pair (either by direct base-pair-complementarity or by a sequence-  
5 specific binding protein or other mechanism),  $P_{thom}(s)$  would equal  $P_{cis}(s)$  at all separations.  
6 However, if homologous loci were linked with each other intermittently, pairs of loci at shorter  
7 distances would contact less frequently in *thom* than in *cis* ( $P_{thom}(s) < P_{cis}(s)$ ), and at sufficiently  
8 large separations pairs of loci would contact each other as often in *thom* as in *cis* ( $P_{thom}(s) =$   
9  $P_{cis}(s)$ ). In our data, in tight regions, *thom* and *cis* contacts approached each other in frequency at  
10  $s = \sim 10-30$  kb, and, in loose regions, only for loci located on the ends of the region (i.e. at  $s \sim 150$   
11 kb for 100-200 kb regions and at  $s \sim 300$  kb for 200-400 kb regions) (Supplementary Fig. 7).  
12 Thus, we concluded that our data was consistent with a model, where tightly paired regions are  
13 connected in *thom* every  $\sim 10-30$  kb, within the average domain size in these regions, and  
14 probably at domain boundaries, and loosely paired regions are connected only at their  
15 boundaries. This allowed us to hypothesize that (a) the difference between tightly and loosely  
16 paired region is due to higher frequency of *thom* connections, in tightly paired regions (b) pairing  
17 at loose regions is affected by pairing at the flanking tight regions. To conclude, within our  
18 resolution limit ( $\sim 16$  kb), and given that in tightly paired regions, *thom* contacts at the highest  
19 registration appeared as frequent as *cis* contacts at  $s = \sim 5$  kb and, in loose regions, the frequency  
20 of such *thom* contacts matched that of *cis* contacts at  $s = \sim 30$  kb (Fig. 2h), pairing in tight regions  
21 is more precise, likely due to more frequent connections between homologs within tight regions,  
22 possibly at domain boundaries. Furthermore, we found that *thom* contact frequency approached  
23 93.2% of *cis* in tightly paired regions (at  $s = 100-300$  kb) (defined as a geometric mean of

1 thom/cis contact frequency at s =100-300kb), suggesting that as many as 93.2% of cells in our  
2 sample are exhibiting pairing at those regions (Supplementary Fig. 7). The fraction of cells  
3 without pairing, could represent a population of cells that are undergoing mitosis. Using the same  
4 approach, we found that the fraction of entirely unpaired tight regions in Slmb and TopII  
5 knockdowns increased by 6.80% and 7.50%, relative to mock, and 12.2% and 12.9%, relative to  
6 untreated sample (Supplementary Fig. 12).

## 8 **Supplementary References**

- 9 1 Erceg, J. *et al.* The genome-wide, multi-layered architecture of chromosome pairing in early Drosophila  
10 embryos *bioRxiv*. Preprint at <https://www.biorxiv.org/content/10.1101/443028v1> (2018).
- 11 2 Sexton, T. *et al.* Three-dimensional folding and functional organization principles of the Drosophila  
12 genome. *Cell* **148**, 458-472, doi:10.1016/j.cell.2012.01.010 (2012).
- 13 3 Bantignies, F. *et al.* Polycomb-dependent regulatory contacts between distant Hox loci in Drosophila. *Cell*  
14 **144**, 214-226, doi:10.1016/j.cell.2010.12.026 (2011).
- 15 4 Gelbart, W. M. Synapsis-dependent allelic complementation at the decapentaplegic gene complex in  
16 Drosophila melanogaster. *Proc Natl Acad Sci U S A* **79**, 2636-2640 (1982).
- 17 5 Leiserson, W. M., Bonini, N. M. & Benzer, S. Transvection at the eyes absent gene of Drosophila. *Genetics*  
18 **138**, 1171-1179 (1994).
- 19 6 Gibson, J. B. R., D. S.; Bartoszewski, S.; Wilks, A. V. Structural Changes in the Promoter Region Mediate  
20 Transvection at the sn-Glycerol-3-Phosphate Dehydrogenase Gene of Drosophila melanogaster.  
21 *Biochemical Genetics* **37**, 301-315 (1999).
- 22 7 Kassis, J. A. Unusual properties of regulatory DNA from the Drosophila engrailed gene: three "pairing-  
23 sensitive" sites within a 1.6-kb region. *Genetics* **136**, 1025-1038 (1994).
- 24 8 Gohl, D., Muller, M., Pirrotta, V., Affolter, M. & Schedl, P. Enhancer blocking and transvection at the  
25 Drosophila apterous locus. *Genetics* **178**, 127-143, doi:10.1534/genetics.107.077768 (2008).
- 26 9 Fujioka, M., Wu, X. & Jaynes, J. B. A chromatin insulator mediates transgene homing and very long-range  
27 enhancer-promoter communication. *Development* **136**, 3077-3087, doi:10.1242/dev.036467 (2009).
- 28 10 Fujioka, M., Mistry, H., Schedl, P. & Jaynes, J. B. Determinants of Chromosome Architecture: Insulator  
29 Pairing in cis and in trans. *PLoS Genet* **12**, e1005889, doi:10.1371/journal.pgen.1005889 (2016).
- 30 11 Cunningham, M. D., Brown, J. L. & Kassis, J. A. Characterization of the polycomb group response  
31 elements of the Drosophila melanogaster invected Locus. *Mol Cell Biol* **30**, 820-828,  
32 doi:10.1128/mcb.01287-09 (2010).
- 33 12 Kassis, J. A., VanSickle, E. P. & Sensabaugh, S. M. A fragment of engrailed regulatory DNA can mediate  
34 transvection of the white gene in Drosophila. *Genetics* **128**, 751-761 (1991).
- 35 13 Cheng, Y., Kwon, D. Y., Arai, A. L., Mucci, D. & Kassis, J. A. P-element homing is facilitated by  
36 engrailed polycomb-group response elements in Drosophila melanogaster. *PLoS One* **7**, e30437,  
37 doi:10.1371/journal.pone.0030437 (2012).
- 38 14 Coulthard, A. B., Nolan, N., Bell, J. B. & Hilliker, A. J. Transvection at the vestigial locus of Drosophila  
39 melanogaster. *Genetics* **170**, 1711-1721, doi:10.1534/genetics.105.041400 (2005).
- 40 15 Schoborg, T., Kuruganti, S., Rickels, R. & Labrador, M. The Drosophila gypsy insulator supports  
41 transvection in the presence of the vestigial enhancer. *PLoS One* **8**, e81331,  
42 doi:10.1371/journal.pone.0081331 (2013).

1 16 Juni, N. & Yamamoto, D. Genetic analysis of chaste, a new mutation of *Drosophila melanogaster*  
2 characterized by extremely low female sexual receptivity. *J Neurogenet* **23**, 329-340,  
3 doi:10.1080/01677060802471601 (2009).

4 17 Merritt, T. J., Duvernell, D. & Eanes, W. F. Natural and synthetic alleles provide complementary insights  
5 into the nature of selection acting on the Men polymorphism of *Drosophila melanogaster*. *Genetics* **171**,  
6 1707-1718, doi:10.1534/genetics.105.048249 (2005).

7 18 Bing, X., Rzezniczak, T. Z., Bateman, J. R. & Merritt, T. J. Transvection-based gene regulation in  
8 *Drosophila* is a complex and plastic trait. *G3 (Bethesda)* **4**, 2175-2187, doi:10.1534/g3.114.012484 (2014).

9 19 Sass, G. L. & Henikoff, S. Pairing-dependent mislocalization of a *Drosophila* brown gene reporter to a  
10 heterochromatic environment. *Genetics* **152**, 595-604 (1999).

11 20 Csink, A. K. & Henikoff, S. Genetic modification of heterochromatic association and nuclear organization  
12 in *Drosophila*. *Nature* **381**, 529-531, doi:10.1038/381529a0 (1996).

13 21 Csink, A. K., Bounoutas, A., Griffith, M. L., Sabl, J. F. & Sage, B. T. Differential gene silencing by trans-  
14 heterochromatin in *Drosophila melanogaster*. *Genetics* **160**, 257-269 (2002).

15 22 Henikoff, S. & Dreesen, T. D. Trans-inactivation of the *Drosophila* brown gene: evidence for  
16 transcriptional repression and somatic pairing dependence. *Proc Natl Acad Sci U S A* **86**, 6704-6708  
17 (1989).

18 23 Pattatucci, A. M. & Kaufman, T. C. The homeotic gene *Sex combs reduced* of *Drosophila melanogaster* is  
19 differentially regulated in the embryonic and imaginal stages of development. *Genetics* **129**, 443-461  
20 (1991).

21 24 Southworth, J. W. & Kennison, J. A. Transvection and silencing of the *Scr* homeotic gene of *Drosophila*  
22 *melanogaster*. *Genetics* **161**, 733-746 (2002).

23 25 Johnston, R. J., Jr. & Desplan, C. Interchromosomal communication coordinates intrinsically stochastic  
24 expression between alleles. *Science* **343**, 661-665, doi:10.1126/science.1243039 (2014).

25 26 Lewis, E. B. The Theory and Application of a New Method of Detecting Chromosomal Rearrangements in  
26 *Drosophila melanogaster*. *The American Naturalist* **88**, 225-239 (1954).

27 27 Gemkow, M. J., Verveer, P. J. & Arndt-Jovin, D. J. Homologous association of the Bithorax-Complex  
28 during embryogenesis: consequences for transvection in *Drosophila melanogaster*. *Development* **125**, 4541-  
29 4552 (1998).

30 28 Hartl, T. A., Smith, H. F. & Bosco, G. Chromosome alignment and transvection are antagonized by  
31 condensin II. *Science* **322**, 1384-1387, doi:10.1126/science.1164216 (2008).

32 29 Martinez-Laborda, A., Gonzalez-Reyes, A. & Morata, G. Trans regulation in the Ultrabithorax gene of  
33 *Drosophila*: alterations in the promoter enhance transvection. *Embo j* **11**, 3645-3652 (1992).

34 30 Lewis, E. B. A gene complex controlling segmentation in *Drosophila*. *Nature* **276**, 565-570 (1978).

35 31 Ronshaugen, M. & Levine, M. Visualization of trans-homolog enhancer-promoter interactions at the Abd-  
36 B Hox locus in the *Drosophila* embryo. *Dev Cell* **7**, 925-932, doi:10.1016/j.devcel.2004.11.001 (2004).

37 32 Hagstrom, K., Muller, M. & Schedl, P. A Polycomb and GAGA dependent silencer adjoins the Fab-7  
38 boundary in the *Drosophila* bithorax complex. *Genetics* **146**, 1365-1380 (1997).

39 33 Muller, M., Hagstrom, K., Gyurkovics, H., Pirrotta, V. & Schedl, P. The mcp element from the *Drosophila*  
40 *melanogaster* bithorax complex mediates long-distance regulatory interactions. *Genetics* **153**, 1333-1356  
41 (1999).

42 34 Fudenberg, G., Abdennur, N., Imakaev, M., Goloborodko, A. & Mirny, L. A. Emerging Evidence of  
43 Chromosome Folding by Loop Extrusion. *Cold Spring Harb Symp Quant Biol*,  
44 doi:10.1101/sqb.2017.82.034710 (2018).

45 35 Schwarzer, W. *et al.* Two independent modes of chromatin organization revealed by cohesin removal.  
46 *Nature* **551**, 51-56, doi:10.1038/nature24281 (2017).

47
